# Supplementary material
Source: PubMed Central journal article supplement (PMC5814135)
Supplement: NIHMS933622-supplement.pdf [file NIHMS933622-supplement.pdf]

Supplemental Table. International Classification of Diseases codes used to electronically identify comorbidities among atrial fibrillation patients.

| <b>Comorbidity</b>                            | <b>ICD-9 Codes</b>                                                      |
|-----------------------------------------------|-------------------------------------------------------------------------|
| Hypertension                                  | 401-405, 437.2<br>642.0-642.2                                           |
| Hyperlipidemia                                | 272.0-272.4                                                             |
| Diabetes                                      | 250                                                                     |
| Heart failure                                 | 428                                                                     |
| Myocardial infarction                         | 410, 412                                                                |
| Aortic atherosclerotic disease                | 441.0-441.7                                                             |
| Peripheral vascular disease                   | 440.20, 440.22-440.8, 442<br>443.1-443.80, 443.82-443.9<br>785.4, V43.4 |
| Ischemic stroke/TIA                           | 433-436                                                                 |
| Hemorrhagic stroke                            | 430-432                                                                 |
| Chronic pulmonary disease                     | 494-496<br>500-505, 506.4                                               |
| Liver disease                                 | 452, 453.0<br>456.0-456.21<br>571.2, 571.4-571.6<br>572.2-572.8         |
| Renal disease                                 | 582.0-582.8, 583.0-583.7<br>585.3-585.6                                 |
| Malignancy (including metastatic solid tumor) | 140-172, 174-195.8<br>196-198.1, 198.3-199<br>200-208                   |

TIA = transient ischemic attack.
